# Supplementary material for: Have interventions aimed at assisting general practitioners in facilitating earlier diagnosis of type 1 diabetes in children been successful in preventing acute complications? A systematic review
Source: PubMed Central journal article supplement — BMJ Open. 2024 Oct 1;14(10):e085635. doi: 10.1136/bmjopen-2024-085635 (PMC11448208; doi:10.1136/bmjopen-2024-085635), 2024-10-01
Supplement: bmjopen-14-10-s001.pdf [file bmjopen-14-10-s001.pdf]

## MEDLINE

| # | Search command                                                                                                                                                                                                                                                                                                                                                                                                                                                                                                                                                                                    |
|---|---------------------------------------------------------------------------------------------------------------------------------------------------------------------------------------------------------------------------------------------------------------------------------------------------------------------------------------------------------------------------------------------------------------------------------------------------------------------------------------------------------------------------------------------------------------------------------------------------|
| 1 | Diabetes Mellitus, Type 1/di [Diagnosis]                                                                                                                                                                                                                                                                                                                                                                                                                                                                                                                                                          |
| 2 | Diabetic Ketoacidosis/                                                                                                                                                                                                                                                                                                                                                                                                                                                                                                                                                                            |
| 3 | ((diagnos* or referral or misdiagnos*) adj2 (delay* or late or missed)) or diagnosis or intervention or opportunit*).mp. [mp=title, book title, abstract, original title, name of substance word, subject heading word, floating sub-heading word, keyword heading word, organism supplementary concept word, protocol supplementary concept word, rare disease supplementary concept word, unique identifier, synonyms, population supplementary concept word, anatomy supplementary concept word]                                                                                               |
| 4 | ("general practice" or "primary care" or "family medic*" or GP or "general practitioner*" or "primary care practitioner*" or "primary care doctor*").mp. [mp=title, book title, abstract, original title, name of substance word, subject heading word, floating sub-heading word, keyword heading word, organism supplementary concept word, protocol supplementary concept word, rare disease supplementary concept word, unique identifier, synonyms, population supplementary concept word, anatomy supplementary concept word]                                                               |
| 5 | (Paediatric* or pediatric* or child* or adolescen* or youth or girl* or boy* or "young people").mp. [mp=title, book title, abstract, original title, name of substance word, subject heading word, floating sub-heading word, keyword heading word, organism supplementary concept word, protocol supplementary concept word, rare disease supplementary concept word, unique identifier, synonyms, population supplementary concept word, anatomy supplementary concept word]                                                                                                                    |
| 6 | ("type 1 diabetes" or T1DM or T1D or "insulin dependent diabetes" or "juvenile diabetes" or "diabetes type 1" or "diabetes mellitus type 1" or iddm or ((ketoacido* or dka) adj2 (present* or onset or diagnos*))).mp. [mp=title, book title, abstract, original title, name of substance word, subject heading word, floating sub-heading word, keyword heading word, organism supplementary concept word, protocol supplementary concept word, rare disease supplementary concept word, unique identifier, synonyms, population supplementary concept word, anatomy supplementary concept word] |
| 7 | 1 or 2 or 6                                                                                                                                                                                                                                                                                                                                                                                                                                                                                                                                                                                       |
| 8 | 3 and 4 and 5 and 7                                                                                                                                                                                                                                                                                                                                                                                                                                                                                                                                                                               |

## EMBASE

| # | Search command                                                                                                                                                                                                                                                                                                                                                                                            |
|---|-----------------------------------------------------------------------------------------------------------------------------------------------------------------------------------------------------------------------------------------------------------------------------------------------------------------------------------------------------------------------------------------------------------|
| 1 | (paediatric* or pediatric* or child* or adolescen* or youth or girl* or boy* or young people).mp. [mp=title, abstract, heading word, drug trade name, original title, device manufacturer, drug manufacturer, device trade name, keyword heading word, floating subheading word, candidate term word]                                                                                                     |
| 2 | ((("type 1 diabetes" or T1D or "insulin dependent diabetes" or "juvenile diabetes" or "diabetes type 1" or "diabetes mellitus type 1" or IDDM or IDD or ketoacido* or DKA) not "type 2 diabetes").mp. [mp=title, abstract, heading word, drug trade name, original title, device manufacturer, drug manufacturer, device trade name, keyword heading word, floating subheading word, candidate term word] |
| 3 | ((diagnos* or referral) adj2 (delayed or late or missed)) or diagnosis or present* or admitt* or intervent* or campaign* or opportunit* or reduc* or prevent*).mp. [mp=title, abstract, heading word, drug trade name, original title, device manufacturer,                                                                                                                                               |

|   |                                                                                                                                                                                                                                                                                                                                                                                 |
|---|---------------------------------------------------------------------------------------------------------------------------------------------------------------------------------------------------------------------------------------------------------------------------------------------------------------------------------------------------------------------------------|
|   | drug manufacturer, device trade name, keyword heading word, floating subheading word, candidate term word]                                                                                                                                                                                                                                                                      |
| 4 | ("general practice" or "primary care" or "family medic*" or GP or "general practitioner" or "primary care practitioner" or "primary care doctor" or "family doctor").mp.<br>[mp=title, abstract, heading word, drug trade name, original title, device manufacturer, drug manufacturer, device trade name, keyword heading word, floating subheading word, candidate term word] |
| 5 | 1 and 2 and 3 and 4                                                                                                                                                                                                                                                                                                                                                             |

#### EVIDENCE BASED MEDICINE REVIEWS

| # | Search command                                                                                                                                                                                                   |
|---|------------------------------------------------------------------------------------------------------------------------------------------------------------------------------------------------------------------|
| 1 | Paediatric* or pediatric* or child* or adolescen* or youth or girl* or boy* or "young people"                                                                                                                    |
| 2 | "type 1 diabetes" or t1d or T1DM or "insulin dependent diabetes" or "juvenile diabetes" or "diabetes type 1" or "diabetes mellitus type 1" or iddm or ((ketoacido* or dka) adj2 (present* or onset or diagnos*)) |
| 3 | ((diagnos* or referral or misdiagnos*) adj2 (delay* or late or missed)) or diagnosis or intervent* or opportunit* or reduc* or prevent* or communit* or tool or decision or support).mp.                         |
| 4 | "general practice" or "primary care" or "family medic*" or GP or "general practitioner*" or "primary care practitioner*" or "primary care doctor*"                                                               |
| 5 | 1 and 2 and 3 and 4                                                                                                                                                                                              |

#### CINAHL

| # | Search command                                                                                                                                                                                                   |
|---|------------------------------------------------------------------------------------------------------------------------------------------------------------------------------------------------------------------|
| 1 | (Paediatric* OR pediatric* OR child* OR adolescen* OR youth OR girl* OR boy* OR "young people")                                                                                                                  |
| 2 | ("type 1 diabetes" OR T1DM OR T1D OR "insulin dependent diabetes" OR "juvenile diabetes" OR "diabetes type 1" OR "diabetes mellitus type 1" OR iddm OR ((ketoacido* OR dka) N2 (present* OR onset OR diagnos*))) |
| 3 | (MH "Diabetic Mellitus, Type 1")                                                                                                                                                                                 |
| 4 | (MH "Diabetic Ketoacidosis")                                                                                                                                                                                     |
| 5 | ((diagnos* OR referral OR misdiagnos*) N2 (delay* OR late OR missed)) OR diagnosis OR intervent* OR opportunit* OR prevent* OR decision OR support* OR tool)                                                     |
| 6 | ("general practice" OR "primary care" OR "family medic*" OR GP OR "general practitioner*" OR "primary care practitioner*" OR "primary care doctor*")                                                             |
| 7 | 2 or 3 or 4                                                                                                                                                                                                      |
| 8 | 1 and 5 and 6 and 7                                                                                                                                                                                              |

## WEB OF SCIENCE

### Search command:

TS=(Paediatric\* OR pediatric\* OR child\* OR adolescen\* OR youth OR girl\* OR boy\* OR "young people")  
 AND ALL=("general practice" OR "primary care" OR "family medic\*" OR GP OR "general practitioner\*" OR "primary care practitioner\*" OR "primary care doctor\*")  
 AND TS=("type 1 diabetes" OR T1DM OR T1D OR "insulin dependent diabetes" OR "juvenile diabetes" OR "diabetes type 1" OR "diabetes mellitus type 1" OR iddm OR ((ketoacido\* OR dka) NEAR/2 (present\* OR onset OR diagnos\*)))  
 AND TS=((diagnos\* OR referral OR misdiagnos\*) NEAR/2 (delay\* OR late OR missed OR timely OR early OR quick\*) OR diagnosis OR intervention OR opportunit\*)

### Additional notes:

- Exact search turned on.
- Filtered for English language only.
- Filtered for years 2000-2023

## GOOGLE SCHOLAR

### Search command: Note: Google Scholar Advanced Search Used:

Allintitle: (("type 1 diabetes" OR "T1D" OR "juvenile onset diabetes" OR "T1DM" OR "insulin dependent diabetes") AND ("new-onset" OR "first") AND ("children" OR "paediatric" OR "pediatric" OR "young people") AND ("intervention" OR "opportunity" OR "prevent" OR "decision support" OR "community" OR "campaign" OR "education"))

### Filters used:

Custom range: 2000-2023

Sort by relevance

Any type

Include citations (not patents)

English only

**Note:** we did not include general practitioner related terms in this search strategy because when we did, it did not give us any citations.

## General search strategy/initial concept mapping:

| Research concept                                                     | Alternate words                                                                                                                                                                   |
|----------------------------------------------------------------------|-----------------------------------------------------------------------------------------------------------------------------------------------------------------------------------|
| Children                                                             | Paediatric*, pediatric*, child*, adolescen*, youth, girl*, boy*, young people                                                                                                     |
| Type 1 diabetes, diabetic ketoacidosis                               | type 1 diabetes, T1DM, insulin dependent diabetes, juvenile diabetes, diabetes type 1, diabetes mellitus type 1, iddm, ((ketoacido* or dka) adj2 (present* or onset or diagnos*)) |
| Diagnosis/presentation/admission<br>Intervention/reducing/preventing | ((diagnos* or referral) adj2 (delayed or late or missed)), diagnosis, presentation*, admission*, Intervent*, opportunit*, reduc*, campaign*, prevent*, communit*                  |
| General practice                                                     | General practice, primary care, family medic*, GP, general practitioner, primary care practitioner, primary care doctor                                                           |
