# Supplementary material for: Have interventions aimed at assisting general practitioners in facilitating earlier diagnosis of type 1 diabetes in children been successful in preventing acute complications? A systematic review
Source: PubMed Central journal article supplement — BMJ Open. 2024 Oct 1;14(10):e085635. doi: 10.1136/bmjopen-2024-085635 (PMC11448208; doi:10.1136/bmjopen-2024-085635), 2024-10-01
Supplement: bmjopen-14-10-s002.pdf [file bmjopen-14-10-s002.pdf]

**APPENDIX 1 RISK OF BIAS ASSESSMENT**

ROBINS-I levels of risk of bias: low, moderate, severe, critical. Note: NI = No Information, denoting when there is insufficient information within the study to ascertain a level of risk of bias.

| <b>Townson, 2016</b>                               | <b>Reviewer 1:</b> | <b>Reviewer 2:</b> |
|----------------------------------------------------|--------------------|--------------------|
| Bias due to confounding                            | Low                | Low                |
| Bias in selection of participants                  | Moderate           | Moderate           |
| Bias in classification of interventions            | Low                | Low                |
| Bias due to deviations from intended interventions | NI                 | NI                 |
| Bias due to missing data                           | Low                | Moderate           |
| Bias in measurement of outcomes                    | Low                | Low                |
| Bias in selection of reported results              | Low                | Low                |

| <b>Ahmed, 2016</b>                                 | <b>Reviewer 1:</b> | <b>Reviewer 2:</b> |
|----------------------------------------------------|--------------------|--------------------|
| Bias due to confounding                            | Low                | Low                |
| Bias in selection of participants                  | Low                | Low                |
| Bias in classification of interventions            | Low                | Low                |
| Bias due to deviations from intended interventions | NI                 | NI                 |
| Bias due to missing data                           | Low                | Low                |
| Bias in measurement of outcomes                    | Low                | Low                |
| Bias in selection of reported results              | Low                | Low                |

| <b>Patwardhan, 2018</b>                            | <b>Reviewer 1:</b> | <b>Reviewer 2:</b> |
|----------------------------------------------------|--------------------|--------------------|
| Bias due to confounding                            | Low                | Low                |
| Bias in selection of participants                  | Moderate           | Moderate           |
| Bias in classification of interventions            | Low                | Low                |
| Bias due to deviations from intended interventions | Low                | Low                |
| Bias due to missing data                           | Low                | Low                |
| Bias in measurement of outcomes                    | Low                | Low                |
| Bias in selection of reported results              | Low                | Low                |

| <b>King, 2012</b>                                  | <b>Reviewer 1:</b> | <b>Reviewer 2:</b> |
|----------------------------------------------------|--------------------|--------------------|
| Bias due to confounding                            | Low                | Low                |
| Bias in selection of participants                  | Low                | Low                |
| Bias in classification of interventions            | Low                | Low                |
| Bias due to deviations from intended interventions | Moderate           | Moderate           |
| Bias due to missing data                           | Low                | Low                |
| Bias in measurement of outcomes                    | Low                | Low                |
| Bias in selection of reported results              | Low                | Low                |

| <b>Darmonkow, 2021</b>                             | <b>Reviewer 1:</b> | <b>Reviewer 2:</b> |
|----------------------------------------------------|--------------------|--------------------|
| Bias due to confounding                            | Low                | Low                |
| Bias in selection of participants                  | Low                | Low                |
| Bias in classification of interventions            | Low                | Low                |
| Bias due to deviations from intended interventions | Low                | Low                |
| Bias due to missing data                           | Low                | Low                |
| Bias in measurement of outcomes                    | Low                | Low                |
| Bias in selection of reported results              | Low                | Low                |
